# Supplementary material
Source: MDPI journal article supplement (https://www.mdpi.com/2072-4292/13/22/4514)
Supplement: s1 [file s1]

**High spatiotemporal resolution assessment for the impact of historical wetland loss on  
current wetland change trajectory using time series optical remote sensing and SAR data  
– a case study in Zhenlai County, Jilin Province, China.**

**Table S1.** The parameters derived from the Sentinel sensor [1–3].

| Parameters                      | Data Resource<br>and Platform | Method of Calculation                                                                                                                                                                                                                                                                                                                                                                                                                                                                                                                                                       |
|---------------------------------|-------------------------------|-----------------------------------------------------------------------------------------------------------------------------------------------------------------------------------------------------------------------------------------------------------------------------------------------------------------------------------------------------------------------------------------------------------------------------------------------------------------------------------------------------------------------------------------------------------------------------|
| NDVI                            | Sentinel-2,                   | $NDVI = \frac{B_{NIR} - B_{red}}{B_{NIR} + B_{red}}$                                                                                                                                                                                                                                                                                                                                                                                                                                                                                                                        |
| EVI                             | GEE                           | $EVI = \frac{2.5 \times (B_{NIR} - B_{red})}{B_{NIR} + 6 \times B_{red} - 7.5 \times B_{blue} + 1}$                                                                                                                                                                                                                                                                                                                                                                                                                                                                         |
| LSWI                            |                               | $LSWI = \frac{B_{NIR} - B_{SWIR}}{B_{NIR} + B_{SWIR}}$                                                                                                                                                                                                                                                                                                                                                                                                                                                                                                                      |
| NDWI                            |                               | $NDWI = \frac{B_{green} - B_{NIR}}{B_{green} + B_{NIR}}$                                                                                                                                                                                                                                                                                                                                                                                                                                                                                                                    |
| mNDWI                           |                               | $mNDWI = \frac{B_{green} - B_{SWIR}}{B_{green} + B_{SWIR}}$                                                                                                                                                                                                                                                                                                                                                                                                                                                                                                                 |
| I <sub>1</sub> , I <sub>2</sub> | Sentinel-1,<br><br>PolSARpro  | <p>The eigenvalues <math>\lambda_1</math> and <math>\lambda_2</math> of the coherency matrix <math>C_2 =</math></p> $\begin{bmatrix} C_{11} & C_{12} \\ C_{21} & C_{22} \end{bmatrix} = \begin{bmatrix} \langle  S_{VV} ^2 \rangle & \langle S_{VV} S_{VH}^* \rangle \\ \langle S_{VH} S_{VV}^* \rangle & \langle  S_{VH} ^2 \rangle \end{bmatrix}$ <p><math>\langle \cdot \rangle</math>: the spatial average over a selected window size</p> <p>*: the complex conjugate</p> <p><math>S_{VV}</math> and <math>S_{VH}</math>: the dual polarization complex SAR images</p> |
| Anisotropy                      |                               | $A = \frac{\lambda_1 - \lambda_2}{\lambda_1 + \lambda_2}$                                                                                                                                                                                                                                                                                                                                                                                                                                                                                                                   |
| Entropy                         |                               | $H = -P_1 \log_2 P_1 - P_2 \log_2 P_2;$ $P_1 = \frac{\lambda_1}{\lambda_1 + \lambda_2}; \quad P_2 = \frac{\lambda_2}{\lambda_1 + \lambda_2}$ <p><math>H</math>: Entropy</p> <p><math>P_i</math>: the pseudo probabilities</p>                                                                                                                                                                                                                                                                                                                                               |

---

|                 |             |                                                                                                                                                                                                                                  |
|-----------------|-------------|----------------------------------------------------------------------------------------------------------------------------------------------------------------------------------------------------------------------------------|
| Alpha           |             | $\bar{\alpha} = P_1 \alpha + P_2 (\frac{\pi}{2} - \alpha); \quad \alpha = \cos^{-1} \frac{ \chi_1 }{ v_1 }$ <p><math>\bar{\alpha}</math>: Alpha, the mean scattering angle</p> <p><math>\alpha</math> : the scattering angle</p> |
| the derivatives |             | $SE = SE_I + SE_P; \quad SE_I = 2\log(\frac{\pi e Tr[C_2]}{2}); \quad SE_P = 4\log(\frac{det[C_2]}{Tr[C_2]^2})$                                                                                                                  |
| of H and/or A   |             | <p>SE: Shannon entropy, SE<sub>I</sub>: Shannon entropy in intensity, SE<sub>P</sub>:</p> <p>Shannon entropy in polarizability</p> <p>HA, (1-H)(1-A), H(1-A), (1-H)A</p>                                                         |
| $\sigma^0$      | Sentinel-1, | $\sigma_{dB}^0 = 10 \times \log_{10}(k_s \times  DN ^2) + 10 \times \log_{10}(\sin \theta_{loc})$                                                                                                                                |
|                 | SARscape    | <p><math>\sigma_{dB}^0</math>: sigma naught values in dB</p> <p><math>k_s</math>: calibration and processor scaling factor</p> <p>DN: digital number</p> <p><math>\theta_{loc}</math>: local incidence angle</p>                 |
| CC              |             | $\gamma = \frac{\langle S_1 S_2^* \rangle}{\sqrt{\langle S_1 S_1^* \rangle \langle S_2 S_2^* \rangle}}$ <p><math>S_1</math> and <math>S_2</math>: the complex pixel values of backscattering coefficient</p>                     |

---

**Table S2.** Number of the ROI and classification accuracies during 1985 to 2018.

| <b>Year</b> | <b>the Number of the Maps<br/>(Landsat 5, 7, 8)</b> | <b>the Number of<br/>ROI</b> | <b>Overall<br/>Accuracy</b> | <b>Kappa</b> |
|-------------|-----------------------------------------------------|------------------------------|-----------------------------|--------------|
| 1985        | 26, 0, 0                                            | 516                          | 0.86                        | 0.83         |
| 1986        | 38, 0, 0                                            | 558                          | 0.86                        | 0.83         |
| 1987        | 46, 0, 0                                            | 512                          | 0.84                        | 0.80         |
| 1988        | 50, 0, 0                                            | 501                          | 0.85                        | 0.82         |
| 1989        | 50, 0, 0                                            | 508                          | 0.89                        | 0.87         |
| 1990        | 45, 0, 0                                            | 505                          | 0.84                        | 0.81         |
| 1991        | 53, 0, 0                                            | 502                          | 0.87                        | 0.85         |
| 1992        | 56, 0, 0                                            | 502                          | 0.89                        | 0.87         |
| 1993        | 41, 0, 0                                            | 500                          | 0.89                        | 0.87         |
| 1994        | 48, 0, 0                                            | 508                          | 0.90                        | 0.89         |
| 1995        | 44, 0, 0                                            | 520                          | 0.89                        | 0.87         |
| 1996        | 45, 0, 0                                            | 519                          | 0.84                        | 0.81         |
| 1997        | 53, 0, 0                                            | 523                          | 0.88                        | 0.86         |
| 1998        | 42, 0, 0                                            | 510                          | 0.90                        | 0.88         |
| 1999        | 11, 54, 0                                           | 506                          | 0.92                        | 0.90         |
| 2000        | 57, 60, 0                                           | 517                          | 0.92                        | 0.91         |
| 2001        | 60, 53, 0                                           | 553                          | 0.87                        | 0.85         |
| 2002        | 63, 44, 0                                           | 580                          | 0.85                        | 0.82         |
| 2003        | 44, 41, 0                                           | 578                          | 0.88                        | 0.86         |
| 2004        | 57, 55, 0                                           | 505                          | 0.86                        | 0.84         |
| 2005        | 49, 40, 0                                           | 501                          | 0.86                        | 0.83         |
| 2006        | 48, 53, 0                                           | 500                          | 0.90                        | 0.88         |
| 2007        | 54, 42, 0                                           | 511                          | 0.87                        | 0.84         |
| 2008        | 59, 34, 0                                           | 500                          | 0.89                        | 0.87         |
| 2009        | 44, 50, 0                                           | 501                          | 0.92                        | 0.90         |
| 2010        | 42, 42, 0                                           | 501                          | 0.86                        | 0.84         |
| 2011        | 47, 34, 0                                           | 502                          | 0.92                        | 0.91         |
| 2012        | 0, 52, 0                                            | 503                          | 0.94                        | 0.93         |
| 2013        | 0, 43, 43                                           | 502                          | 0.92                        | 0.91         |
| 2014        | 0, 64, 55                                           | 501                          | 0.90                        | 0.89         |
| 2015        | 0, 58, 46                                           | 502                          | 0.95                        | 0.94         |
| 2016        | 0, 51, 48                                           | 507                          | 0.97                        | 0.97         |
| 2017        | 0, 63, 46                                           | 521                          | 0.92                        | 0.91         |
| 2018        | 0, 67, 52                                           | 520                          | 0.88                        | 0.86         |

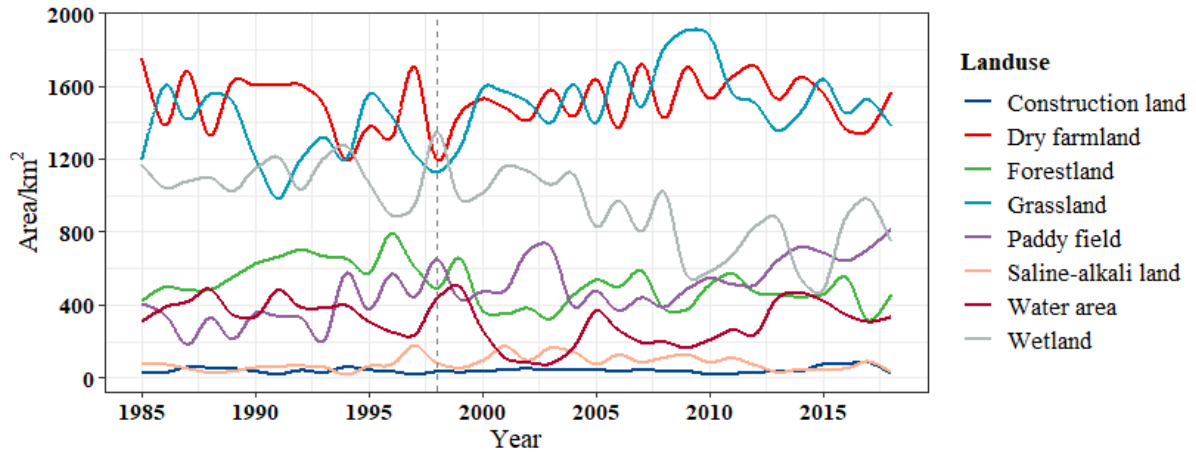

**Figure S1.** Characteristics of different land-use types from 1985 to 2018.

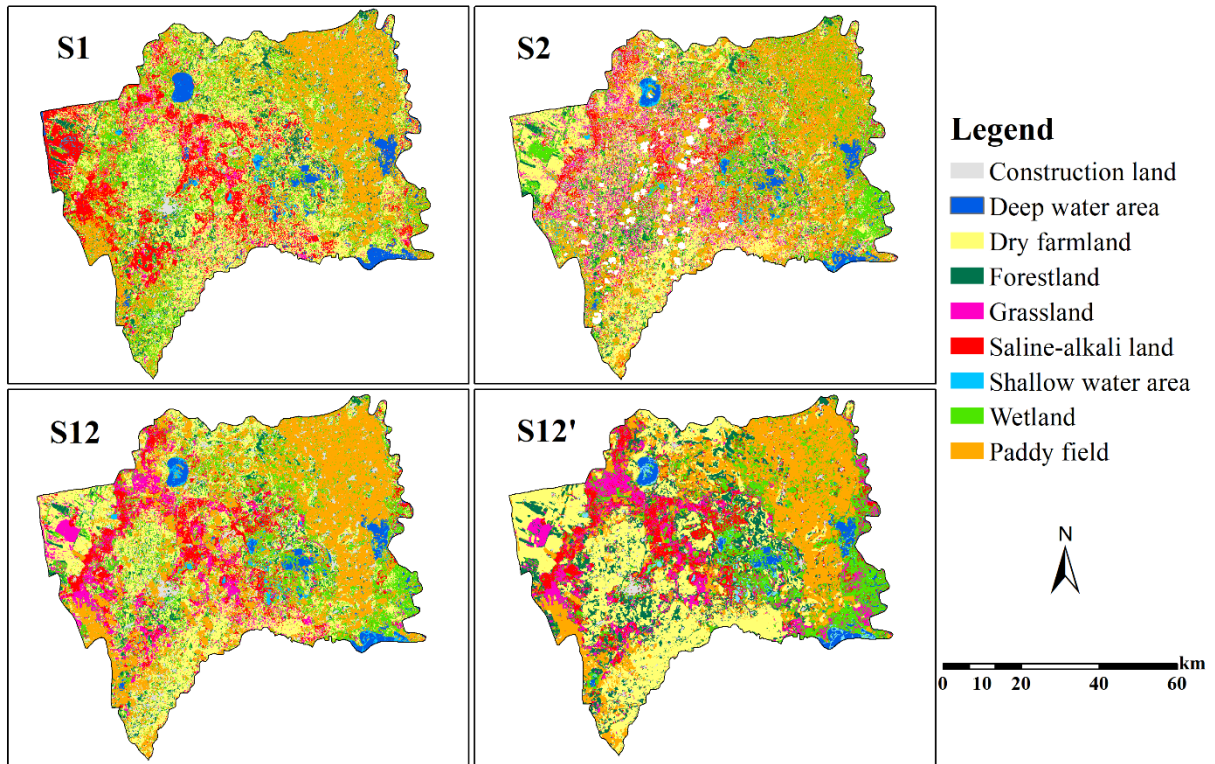

**Figure S2.** The land-use maps based on different data sources or methods. S1 is the land-use map based on Sentinel-1 data using dB, CC, and polarization decomposition method, S2 uses the vegetation and water indices of Sentinel-2 data, S12 is the combination of S1 and S2, S12' is based on S12 and multi-temporal analysis with Sentinel-1 data.

## Reference

1. Mohammadimanesh, F., et al., *Multi-temporal, multi-frequency, and multi-polarization coherence and SAR backscatter analysis of wetlands*. ISPRS Journal of Photogrammetry and Remote Sensing, 2018. **142**: p. 78-93.
2. Pelich, R., et al., *EXPLORING DUAL-POLARIMETRIC DESCRIPTORS FOR SENTINEL-1 BASED SHIP DETECTION*, in *Igarss 2018 - 2018 IEEE International Geoscience and Remote Sensing Symposium*. 2018. p. 2404-2407.
3. Liu, C.-A., et al., *Assessment of the X- and C-Band Polarimetric SAR Data for Plastic-Mulched Farmland Classification*. Remote Sensing, 2019. **11**(6).
